# Supplementary material for: Evaluation of Dithiocarbamate-Modified Silica for Cisplatin Removal from Water
Source: MDPI journal article supplement (doi:10.3390/pr11020472), 2023-02-04
Supplement: s1 [file s1]

# Evaluation of Dithiocarbamate-Modified Silica for Cisplatin Removal from Water

Rachel Lombana Fraguera <sup>1</sup>, José Alejandro Ricardo García <sup>2</sup>, Margarita Edelia Villanueva Tagle <sup>2</sup>, Mario Simeón Pomares Alfonso <sup>1</sup>, Maria Cracchiolo <sup>3</sup>, Anđela Kovačević <sup>3</sup>, Marilena Tolazzi <sup>3</sup>, Andrea Melchior <sup>3,\*</sup> and Martina Sanadar <sup>3,\*</sup>

<sup>1</sup> Institute of Materials Science and Technology (IMRE), University of Havana, Calle Zapata s/n e/Mazon y G, Havana CP 10400, Cuba

<sup>2</sup> Faculty of Chemistry, University of Havana, Havana CP 10400, Cuba

<sup>3</sup> Dipartimento Politecnico di Ingegneria e Architettura, Università di Udine, via del Cottonificio 108, 33100 Udine, Italy

\* Correspondence: andrea.melchior@uniud.it (A.M.); martina.sanadar@uniud.it (M.S.)

## Supplementary Material

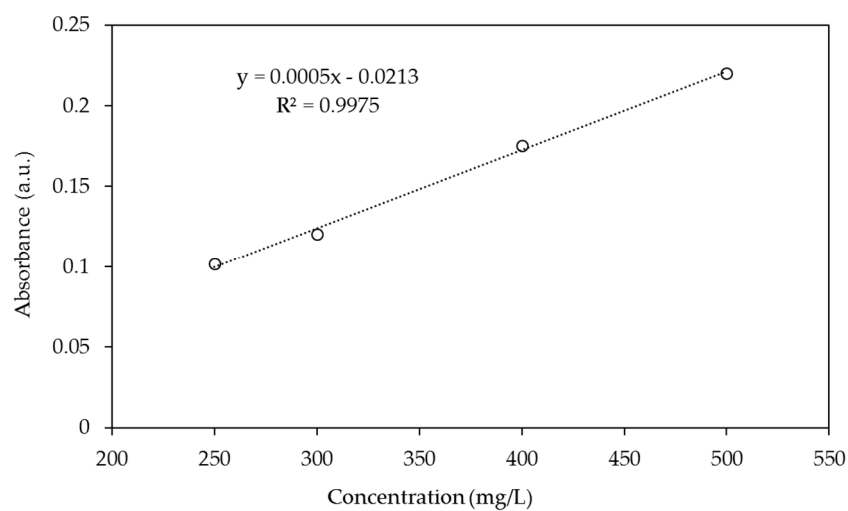

**Figure S1.** Calibration curve for the determination of cisplatin concentration in water (NaCl 0.9% w/v). Absorbance was measured at  $\lambda = 300$  nm.

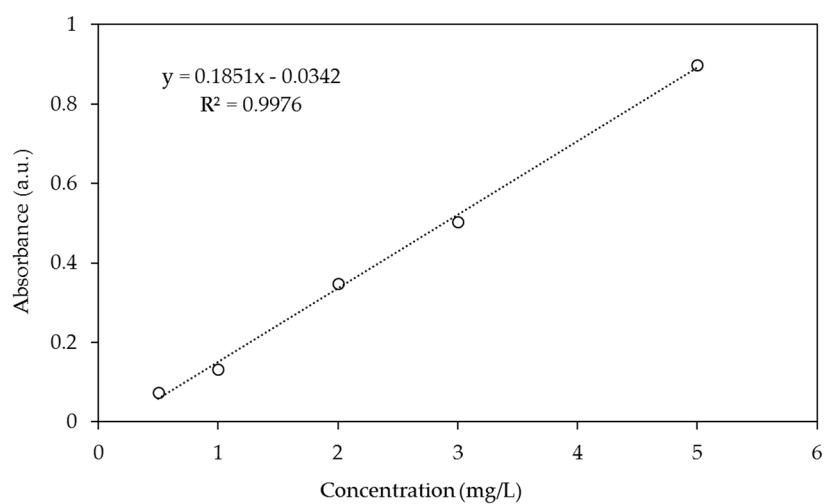

**Figure S2.** Calibration curve for the Pt(DDTC)<sub>2</sub> complex determined in dichloromethane. Absorbance was measured at  $\lambda = 347$  nm.

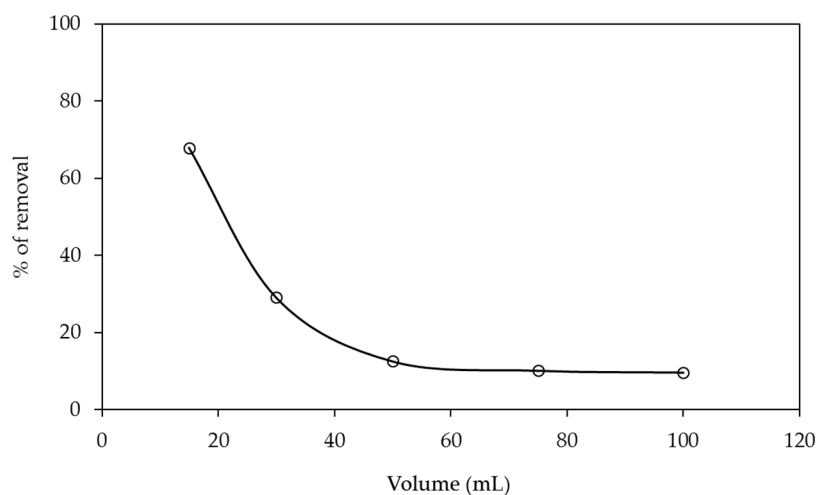

**Figure S3.** Effect of initial volume. Initial cisplatin concentration 5 mg mL<sup>-1</sup>.

**Table S1.** Isotherms employed in this study.  $C_{eq}$  (mg L<sup>-1</sup>) is the equilibrium cisplatin concentration in solution;  $q_e$  is the mass (mg) of adsorbed cisplatin per gram of adsorbent material.

|            |                                      |                                                                                                                                                                                |
|------------|--------------------------------------|--------------------------------------------------------------------------------------------------------------------------------------------------------------------------------|
| Langmuir   | $q_e = \frac{bK_L C_e}{1 + K_L C_e}$ | $C_e$ : liquid phase concentration of platinum (mg L <sup>-1</sup> )<br>$q_e$ : solid phase concentration of platinum (mg g <sup>-1</sup> )<br>$K_L$ : Langmuir constant (L/g) |
| Freundlich | $q_e = K_F C_e^{1/n}$                | $b$ : maximum loading (mg/g)<br>$K_F$ : Freundlich constant<br>$n$ : empirical factor                                                                                          |
